# Supplementary material
Source: Springer Nature journal article supplement (https://www.springermedizin.de/resource/supplementary/12916_2010_315_MOESM2_ESM.pdf/9599618)
Supplement: MOESM2 [file 9599618]

---

### *Telecanthus\**

Definition: Distance between the inner canthi more than 2 SD above the mean. *Objective* OR

Apparently increased distance between the inner canthi. *Subjective*

Comments: Telecanthus may be present without or with **Widely spaced eyes**. In the latter case, **Widely spaced eyes** should be coded separately. Inner canthal distance varies among ethnic groups. Norms are available for American Africans, Chinese, and Caucasians. In the presence of an **Epicanthal fold**, ascertainment of inner canthal distance can be difficult.

Synonym: Dystopia canthorum

---

### *Palpebral Fissure, Upslanted*

Definition: The palpebral fissure inclination is more than 2 SD above the mean for age. *Objective*  
OR

The inclination of the palpebral fissure is greater than typical for age. *Subjective*

Comments: The slant, or inclination, of the palpebral fissure is defined as the angle formed by two lines: an imaginary line that connects the lateral canthus and the medial canthus of each eye, and an imaginary horizontal line formed by the two medial canthi when the patient holds their head with the facial midline vertical, the head in a neutral vertical position (neither flexed nor extended) and the gaze forward. Palpebral fissure inclination norms are specified for Caucasians and for Chinese and African-American populations. Upslanted palpebral fissures may be associated with microcephaly, but this should be coded separately. Some features (e.g., **Ptosis** or **Epicanthus**) may hinder palpebral fissure inclination assessment.

Replaces: Mongoloid slant

---
